# Supplementary material for: Ion-matching porous carbons with ultra-high surface area and superior energy storage performance for supercapacitors
Source: Royal Society of Chemistry journal article supplement (doi:10.1039/c9ta00781d), 2019-01-01
Supplement: c9ta00781d1.pdf [file c9ta00781d1.pdf]

## Supporting Information

### **Ion-matching porous carbons with ultra-high surface area and superior energy storage performance for supercapacitors**

*Lifeng Zhang<sup>\*a</sup>, Yu Guo<sup>a</sup>, Kechao Shen<sup>a</sup>, Jinghao Huo<sup>a</sup>, Yi Liu<sup>a</sup> and Shouwu Guo<sup>\*a,b</sup>*

<sup>a</sup>School of Materials Science and Engineering, Shaanxi University of Science and Technology, Xian 710021, Shaanxi, China.

<sup>b</sup>Department of Electronic Engineering, School of Electronic Information and Electrical Engineering, Shanghai Jiao Tong University, Shanghai 200240, China.

Corresponding Author:

\* E-mail: zhanglifeng@sust.edu.cn; guoshouwu@outlook.com

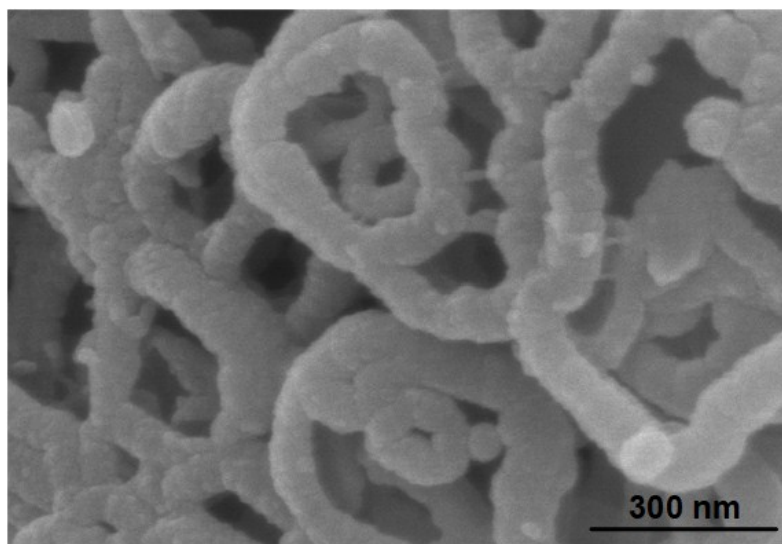

**Figure S1.** SEM image of PPy rings.

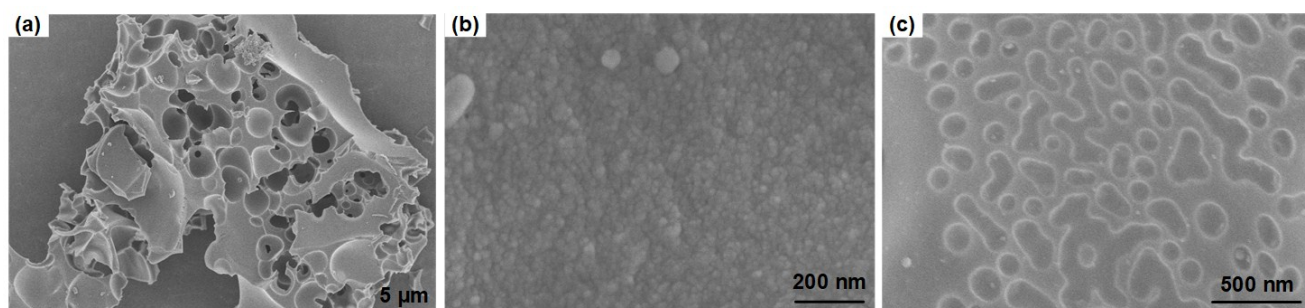

**Figure S2.** SEM images of PPC-700: (a) at low-magnification; (b) accidented surface; (c) wormlike pits.

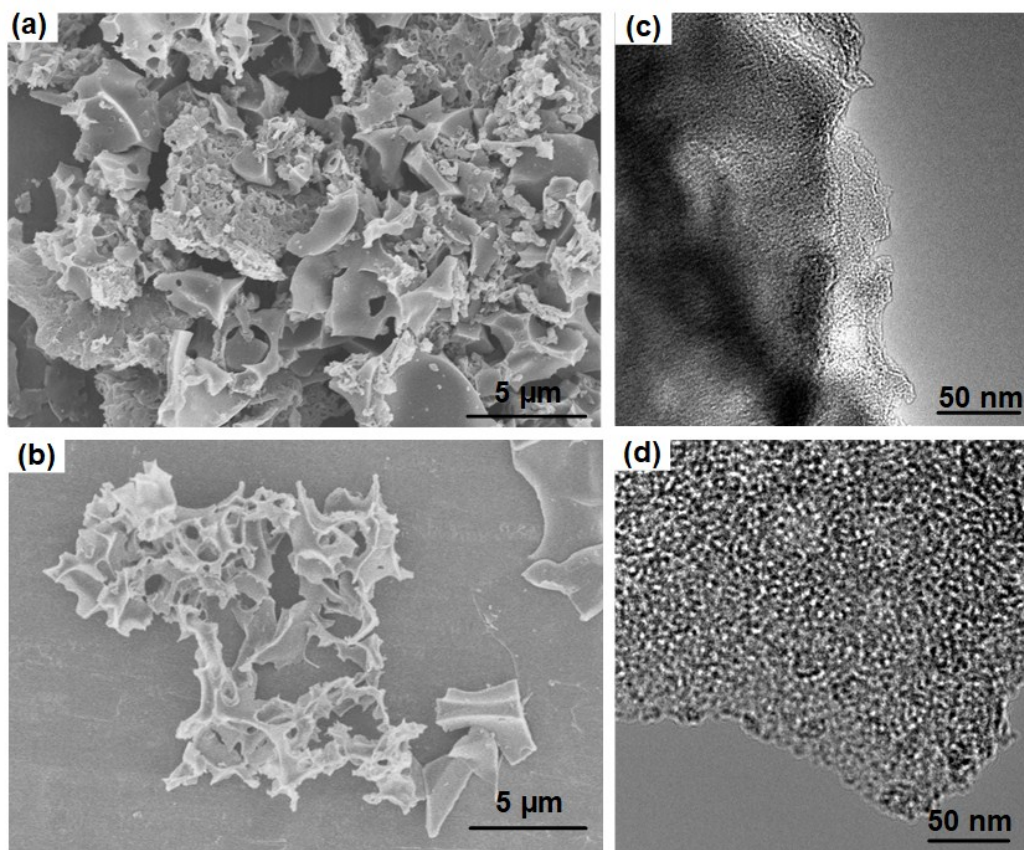

**Figure S3.** The morphology of the PPC-600 and PPC-800: (a) SEM image of PPC-600. (b) SEM image of PPC-800. (c) TEM image of PPC-600. (d) TEM image of PPC-800.

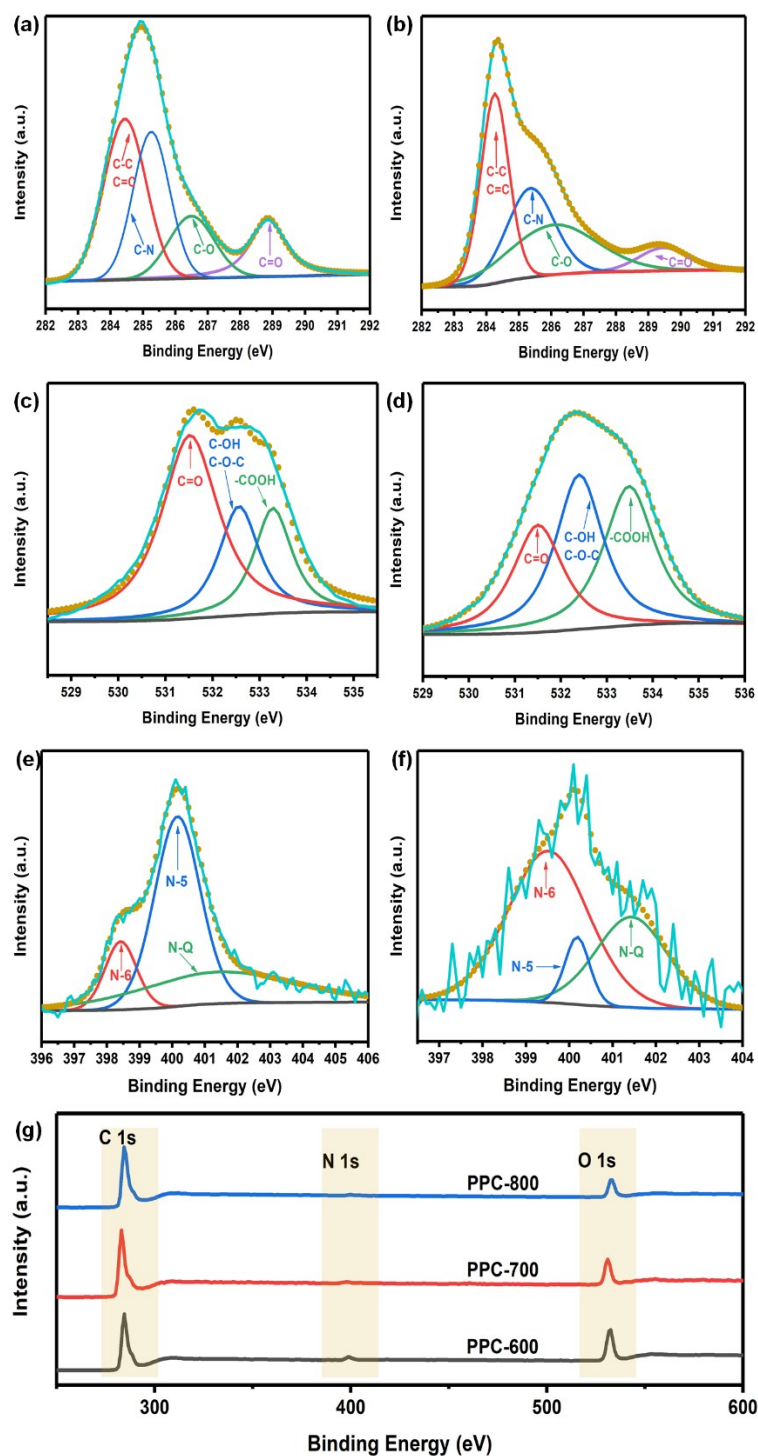

**Figure S4.** High-resolution XPS spectra of PPC-600 (a) C 1s, (c) O 1s, and (e) N 1s; PPC-800 (b) C 1s, (d) O 1s, and (f) N 1s; (g) XPS survey spectra of PPC-600, PPC-700 and PPC-800.

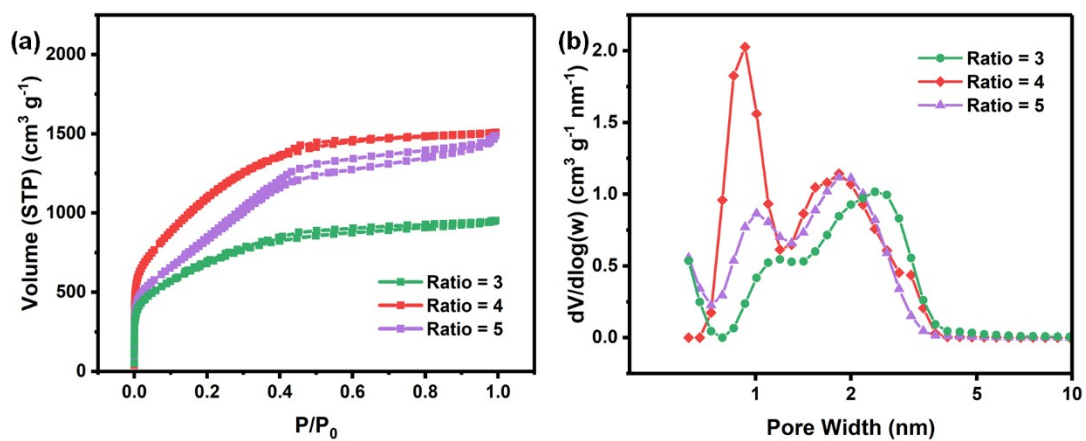

**Figure S5.** (a) Nitrogen adsorption-desorption isotherms and (b) the corresponding pore size distribution of PPC samples prepared by different KOH amount at 700 °C.

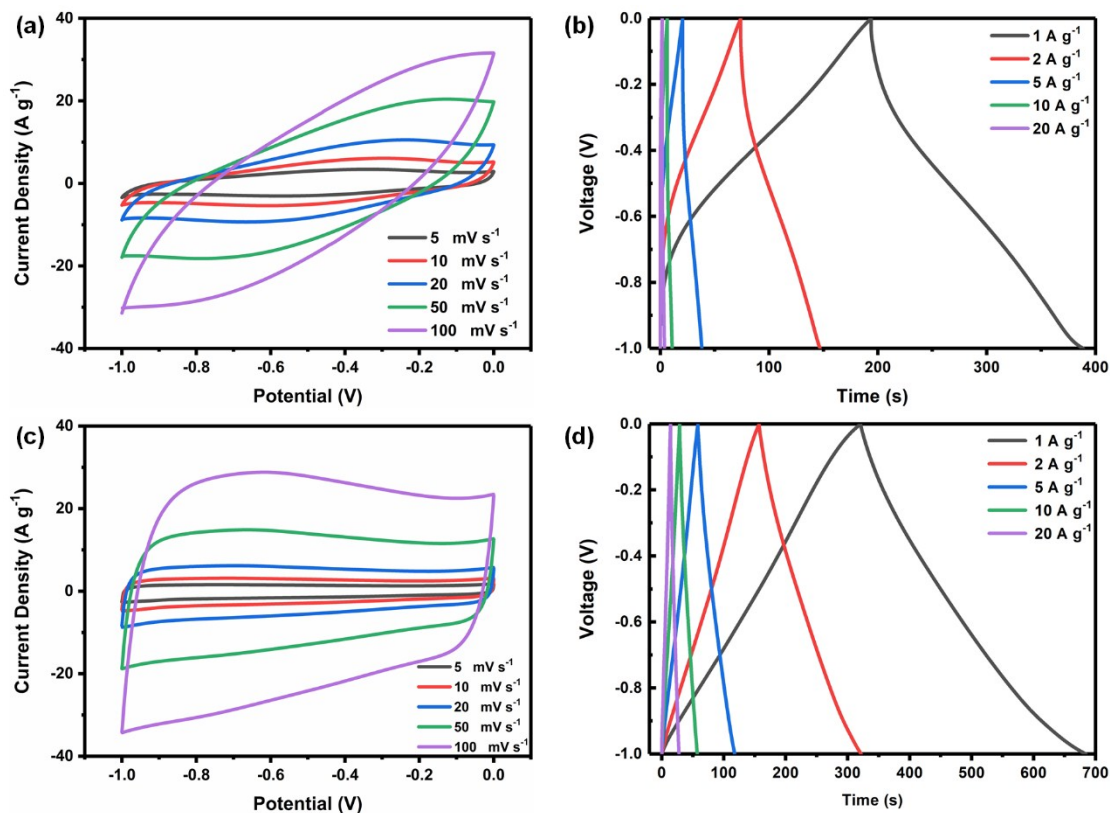

**Figure S6.** Electrochemical performance of PPC-600 and PPC-800 in 3-electrode test using 6 M KOH electrolyte with a potential window of 1.0 V: (a) Cyclic voltammetry of PPC-600 at various scan rates of 5, 10, 20, 50 and 100 mV s<sup>-1</sup>; (b) Galvanostatic charge-discharge profiles of PPC-600 at current densities of 1, 2, 5, 10 and 20 A g<sup>-1</sup>; (c) Cyclic voltammetry of PPC-800 at various scan rates of 5, 10, 20, 50 and 100 mV s<sup>-1</sup>; (d) Galvanostatic charge-discharge profiles of PPC-800 at current densities of 1, 2, 5, 10 and 20 A g<sup>-1</sup>.

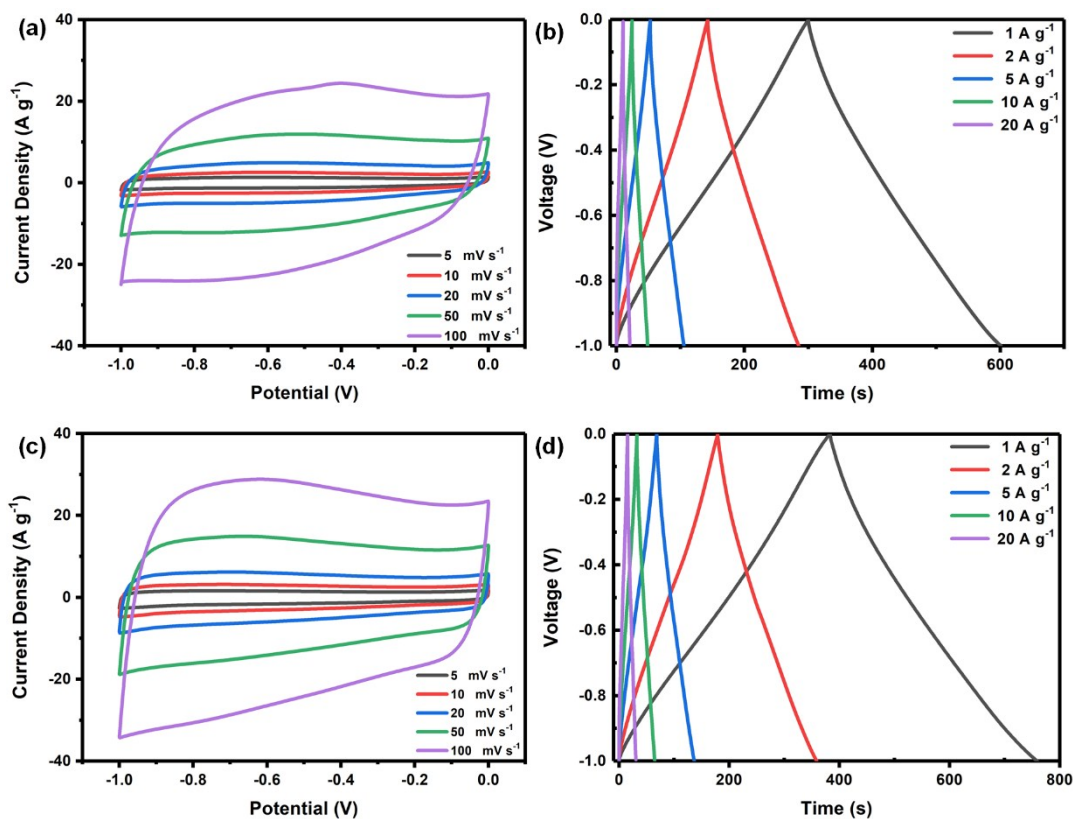

**Figure S7.** Electrochemical performance of PPC samples prepared by different KOH amount at 700 °C in 3-electrode test using 6 M KOH electrolyte with a potential window of 1.0 V: (a) Cyclic voltammety at various scan rates of 5, 10, 20, 50 and 100 mV s<sup>-1</sup> when mass ratio of KOH : PPy equals 3; (b) Galvanostatic charge-discharge profiles at current densities of 1, 2, 5, 10 and 20 A g<sup>-1</sup> when mass ratio of KOH : PPy equals 3; (c) Cyclic voltammety at various scan rates of 5, 10, 20, 50 and 100 mV s<sup>-1</sup> when mass ratio of KOH : PPy equals 5; (d) Galvanostatic charge-discharge profiles at current densities of 1, 2, 5, 10 and 20 A g<sup>-1</sup> when mass ratio of KOH : PPy equals 5.

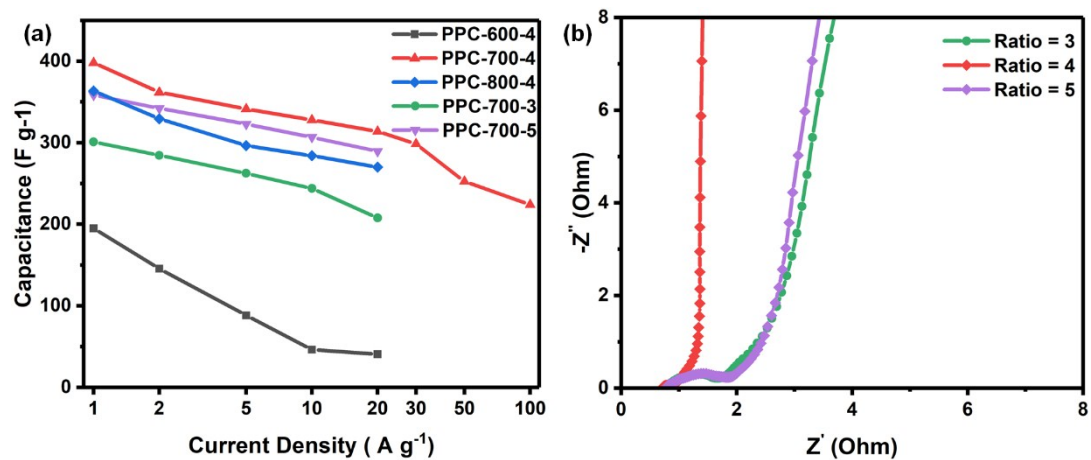

**Figure S8.** (a) capacitive performance at different current densities (PPC-X-Y: X means temperature, Y means KOH amount.) (b) Nyquist plots of PPC samples prepared by different KOH amount at 700 °C in a frequency range of 0.01 to 10<sup>5</sup>Hz with 5mV amplitude.



**Table S1.** Textural properties of PPC samples prepared by different KOH amount at 700 °C

| ratio <sup>a</sup> | SSA <sup>b</sup> (m <sup>2</sup> g <sup>-1</sup> ) | Pore Volume (cm <sup>3</sup> g <sup>-1</sup> ) |                                     |                                     |                                     |
|--------------------|----------------------------------------------------|------------------------------------------------|-------------------------------------|-------------------------------------|-------------------------------------|
|                    |                                                    | V <sub>Total</sub>                             | V <sup>c</sup> <sub>Small</sub> (%) | V <sup>d</sup> <sub>Close</sub> (%) | V <sup>e</sup> <sub>Large</sub> (%) |
| 3                  | 3156.38                                            | 2.301                                          | 0.241(11%)                          | 0.514(22%)                          | 1.546(67%)                          |
| 4                  | 4091.54                                            | 2.334                                          | 0.062(2%)                           | 0.946(41%)                          | 1.326(57%)                          |
| 5                  | 3699.61                                            | 2.060                                          | 0.263(13%)                          | 0.611(30%)                          | 1.186(57%)                          |

a) KOH : PPy

b) Specific Surface Area calculated by Brunauer-Emmett-Teller (BET) method in the relative pressure range of 0.05-0.20

c) Volume of pores smaller than 0.5 nm in width

d) Volume of pores between 0.5 and 1 nm in width

e) Volume of pores larger than 1 nm in width

**Table S2.** Summary of capacitive performance of carbon-based supercapacitors

| Carbon source             | SSA (m <sup>2</sup> g <sup>-1</sup> ) | Capacitance (F g <sup>-1</sup> ) | Current density (A g <sup>-1</sup> ) | Electrolyte                                           | Cycles (Current density/Scanning rate) | Capacitance retention | Ref.      |
|---------------------------|---------------------------------------|----------------------------------|--------------------------------------|-------------------------------------------------------|----------------------------------------|-----------------------|-----------|
| PPy                       | 4091.54                               | 397.9                            | 1A g <sup>-1</sup>                   | 6 M KOH                                               | 30K (10A g <sup>-1</sup> )             | 95%                   | This work |
| PPy                       | 2870                                  | 318.2                            | 0.5A g <sup>-1</sup>                 | 6 M KOH                                               | 10K (5A g <sup>-1</sup> )              | 95.8%                 | [1]       |
| PANi                      | 4073                                  | 225                              | 0.5A g <sup>-1</sup>                 | 0.5 M H <sub>2</sub> SO <sub>4</sub>                  | 10K (5A g <sup>-1</sup> )              | 96%                   | [2]       |
| chitosan                  | 2905                                  | 374.7                            | 1A g <sup>-1</sup>                   | 3 M KOH                                               | 20K (200mV/s)                          | 98%                   | [3]       |
| popcorn                   | 3301                                  | 311                              | 10A g <sup>-1</sup>                  | 6 M KOH                                               | 10K (5A g <sup>-1</sup> )              | 95%                   | [4]       |
| ZIF-8/PAN                 | 417.9                                 | 307.2                            | 1A g <sup>-1</sup>                   | 2 M H <sub>2</sub> SO <sub>4</sub><br>(two-electrode) | 10K (5A g <sup>-1</sup> )              | 98.2%                 | [5]       |
| non-fat powdered milk     | 4051                                  | 247                              | 25 A g <sup>-1</sup>                 | 6 M KOH<br>(two-electrode)                            | 75K (25A g <sup>-1</sup> )             | 80%                   | [6]       |
| commercial silicone resin | 2896                                  | 322                              | 0.5 A g <sup>-1</sup>                | 6 M KOH                                               | 10K (5A g <sup>-1</sup> )              | 93.3%                 | [7]       |
| petroleum asphalt         | 3581                                  | 194                              | 20 A g <sup>-1</sup>                 | 6 M KOH                                               | 10K (2A g <sup>-1</sup> )              | 95.1%                 | [8]       |
| phenol formaldehyde resin | 1224                                  | 388                              | 1A g <sup>-1</sup>                   | 1 M H <sub>2</sub> SO <sub>4</sub>                    | 8K (5A g <sup>-1</sup> )               | 98%                   | [9]       |
| polyphosphazene           | 1798                                  | 105                              | 0.3A g <sup>-1</sup>                 | 6 M KOH<br>(two-electrode)                            | 10K (5A g <sup>-1</sup> )              | 89.5%                 | [10]      |
| PMMA/bacterial cellulose  | 2076                                  | 266                              | 0.5A g <sup>-1</sup>                 | 1 M H <sub>2</sub> SO <sub>4</sub>                    | 10K (5A g <sup>-1</sup> )              | 95%                   | [11]      |
| bradyrhizobium japonicum  | 1275                                  | 358                              | 1A g <sup>-1</sup>                   | 6 M KOH<br>(two-electrode)                            | 8K (1A g <sup>-1</sup> )               | 91%                   | [12]      |
| carbon aerogel            | 450                                   | 151                              | 0.5A g <sup>-1</sup>                 | 6 M KOH                                               | 0.5K (0.5A g <sup>-1</sup> )           | 97.8%                 | [13]      |

## References

1. L. Qie, W. Chen, H. Xu, X. Xiong, Y. Jiang, F. Zou, X. Hu, Y. Xin, Z. Zhang and Y. Huang, *Energy Environ. Sci.*, 2013, **6**, 2497-2504.
2. J. W. To, Z. Chen, H. Yao, J. He, K. Kim, H. H. Chou, L. Pan, J. Wilcox, Y. Cui and Z. Bao, *ACS Cent. Sci.*, 2015, **1**, 68-76.
3. F. Zhang, T. Liu, M. Li, M. Yu, Y. Luo, Y. Tong and Y. Li, *Nano Lett.*, 2017, **17**, 3097-3104.
4. J. Hou, K. Jiang, R. Wei, M. Tahir, X. Wu, M. Shen, X. Wang and C. Cao, *ACS Appl. Mater. Interfaces*, 2017, **9**, 30626-30634.
5. L.-F. Chen, Y. Lu, L. Yu and X. W. Lou, *Energy Environ. Sci.*, 2017, **10**, 1777-1783.
6. J. Pokrzywinski, J. K. Keum, R. E. Ruther, E. C. Self, M. Chi, H. Meyer Iii, K. C. Littrell, D. Aulakh, S. Marble, J. Ding, M. Wriedt, J. Nanda and D. Mitlin, *J. Mater. Chem. A*, 2017, **5**, 13511-13525.
7. J. Yang, J. Hu, M. Zhu, Y. Zhao, H. Chen and F. Pan, *J. Power Sources*, 2017, **365**, 362-371.
8. L. Pan, Y. Wang, H. Hu, X. Li, J. Liu, L. Guan, W. Tian, X. Wang, Y. Li and M. Wu, *Carbon*, 2018, **134**, 345-353.
9. N. P. Wickramaratne, J. Xu, M. Wang, L. Zhu, L. Dai and M. Jaroniec, *Chem. Mater.*, 2014, **26**, 2820-2828.
10. W. Liu, S. Zhang, S. U. Dar, Y. Zhao, R. Akram, X. Zhang, S. Jin, Z. Wu and D. Wu, *Carbon*, 2018, **129**, 420-427.
11. Q. Bai, Q. Xiong, C. Li, Y. Shen and H. Uyama, *ACS Sustainable Chem. Eng.*, 2017, **5**, 9390-9401.
12. Q. Yao, H. Wang, C. Wang, C. Jin and Q. Sun, *ACS Sustainable Chem. Eng.*, 2018, **6**, 4695-4704.
13. Y. Xu, B. Ren, S. Wang, L. Zhang and Z. Liu, *J. Colloid Interface Sci.*, 2018, **527**, 25-32.
